# Supplementary material
Source: PubMed Central journal article supplement (PMC2998200)
Supplement: supp_kwq294_Web_Tables_AJE-00545-2010.pdf [file supp_kwq294_Web_Tables_AJE-00545-2010.pdf]

## Sensitivity analyses

Web Table 1. The association between lung function and mortality: analyses using **FEV<sub>1</sub> percentage predicted**, Whitehall II study, United Kingdom, 2002-2010

| Adjustment                                                                  | HR*  | 95% CI    | % reduction <sup>†</sup> |
|-----------------------------------------------------------------------------|------|-----------|--------------------------|
| Model 1: adjusted for age and sex                                           | 1.55 | 1.11-2.17 |                          |
| Model 2: Model 1 + smoking history <sup>‡</sup>                             | 1.47 | 1.05-2.07 | 12.1                     |
| Model 3: Model 2 + socioeconomic position                                   | 1.45 | 1.03-2.04 | 3.6                      |
| Model 4: Model 2 + other health behaviors <sup>§</sup> + BMI                | 1.38 | 0.98-1.95 | 16.4                     |
| Model 5: Model 2 + blood cholesterol, systolic and diastolic blood pressure | 1.44 | 1.02-2.02 | 5.4                      |
| Model 6: Model 2 + chronic diseases <sup>#</sup>                            | 1.37 | 0.97-1.93 | 18.3                     |
| Model 7: Model 2 + inflammatory markers <sup>**</sup>                       | 1.29 | 0.91-1.82 | 33.9                     |
| Model 8: fully-adjusted                                                     | 1.21 | 0.85-1.72 | 50.5                     |

<sup>a</sup> HR comparing participants in the lower tertile of FEV<sub>1</sub> percentage predicted to those in the top two tertiles.

<sup>b</sup> % reduction comparing Model 2 to Model 1 and then Models 3 to 8 to Model 2

<sup>c</sup> Smoking history constituted using smoking status measured from 1985/88 to 2002/04 and current amount of tobacco smoked in 2002/04.

<sup>d</sup> Alcohol consumption, physical activity, fruit and vegetable consumption.

<sup>e</sup> Diabetes, Coronary Heart Disease and self-reported stroke.

<sup>f</sup> Interleukin-6 and C-reactive protein, log-transformed.

Web Table S2. The association between lung function and mortality: analyses in **never smokers**, Whitehall II study, United Kingdom, 2002-2010 (N deaths/N = 59/2422)

| Adjustment                                                                  | Hazard Ratio <sup>a</sup> | 95% Confidence Interval | % reduction <sup>b</sup> |
|-----------------------------------------------------------------------------|---------------------------|-------------------------|--------------------------|
| Model 1: adjusted for age and sex                                           | 1.99                      | 1.17-2.28               |                          |
| Model 2: Model 1 + socioeconomic position                                   | 2.01                      | 1.17-3.47               | -0.0                     |
| Model 3: Model 1 + health behaviors <sup>c</sup> + BMI                      | 1.83                      | 1.07-3.15               | 12.2                     |
| Model 4: Model 1 + blood cholesterol, systolic and diastolic blood pressure | 1.92                      | 1.12-3.29               | 5.2                      |
| Model 5: Model 1 + chronic diseases <sup>d</sup>                            | 1.84                      | 1.07-3.17               | 11.4                     |
| Model 6: Model 1 + inflammatory markers <sup>e</sup>                        | 1.81                      | 1.05-3.11               | 13.8                     |
| Model 7: fully-adjusted                                                     | 1.64                      | 0.94-2.88               | 28.1                     |

<sup>a</sup> HR comparing participants in the lower sex-specific tertile of forced expiratory volume/height<sup>2</sup> to those in the top two tertiles.

<sup>b</sup> % reduction comparing Models 2 to 7 to Model 1

<sup>c</sup> Alcohol consumption, physical activity, fruit and vegetable consumption

<sup>d</sup> Diabetes, Coronary Heart Disease and self-reported stroke

<sup>e</sup> Interleukin-6 and C-reactive protein, log-transformed

Web Table 3. The association between lung function and mortality: analyses in participants **without a history of asthma**<sup>a</sup>, Whitehall II study, United Kingdom, 2002-2010 (N deaths/N = 130/4336)

| Adjustment                                                                  | Hazard Ratio <sup>b</sup> | 95% Confidence Interval | % reduction <sup>c</sup> |
|-----------------------------------------------------------------------------|---------------------------|-------------------------|--------------------------|
| Model 1: adjusted for age and sex                                           | 1.93                      | 1.34-2.78               |                          |
| Model 2: Model 1 + smoking history <sup>d</sup>                             | 1.87                      | 1.30-2.70               | 4.8                      |
| Model 3: Model 2 + socioeconomic position                                   | 1.84                      | 1.28-2.67               | 2.6                      |
| Model 4: Model 2 + other health behaviors <sup>e</sup> + BMI                | 1.78                      | 1.23-2.57               | 7.9                      |
| Model 5: Model 2 + blood cholesterol, systolic and diastolic blood pressure | 1.83                      | 1.27-2.65               | 3.5                      |
| Model 6: Model 2 + chronic diseases <sup>f</sup>                            | 1.73                      | 1.19-2.50               | 12.4                     |
| Model 7: Model 2 + inflammatory markers <sup>g</sup>                        | 1.64                      | 1.13-2.37               | 21.0                     |
| Model 8: fully-adjusted                                                     | 1.55                      | 1.06-2.26               | 30.0                     |

<sup>a</sup> History of asthma was assessed using self-reported asthma.

<sup>b</sup> HR comparing participants in the lower sex-specific tertile of forced expiratory volume/height<sup>2</sup> to those in the top two tertiles.

<sup>c</sup> % reduction comparing Model 2 to Model 1 and then Models 3 to 8 to Model 2

<sup>d</sup> Smoking history constituted using smoking status measured from 1985/88 to 2002/04 and current amount of tobacco smoked in 2002/04.

<sup>e</sup> Alcohol consumption, physical activity, fruit and vegetable consumption.

<sup>f</sup> Diabetes, Coronary Heart Disease and self-reported stroke.

<sup>g</sup> Interleukin-6 and C-reactive protein, log-transformed.

Web Table 4. The association between lung function and mortality: analyses **stratified by FEV/FVC ratio level**, Whitehall II study, United Kingdom, 2002-2010

| Adjustment                                                                  | Participants with FEV/FVC < 70%<br>(N deaths/N = 36/721) |                         |                          | Participants with FEV/FVC ≥ 70%<br>(N deaths/N = 103/4096) |                         |                          |
|-----------------------------------------------------------------------------|----------------------------------------------------------|-------------------------|--------------------------|------------------------------------------------------------|-------------------------|--------------------------|
|                                                                             | Hazard Ratio <sup>a</sup>                                | 95% Confidence Interval | % reduction <sup>b</sup> | Hazard Ratio <sup>a</sup>                                  | 95% Confidence Interval | % reduction <sup>b</sup> |
| Model 1: adjusted for age and sex                                           | 1.62                                                     | 0.66-3.99               |                          | 1.80                                                       | 1.20-2.70               |                          |
| Model 2: Model 1 + smoking history <sup>c</sup>                             | 1.69                                                     | 0.68-4.18               | -8.8                     | 1.78                                                       | 1.18-2.66               | 1.9                      |
| Model 3: Model 2 + socioeconomic position                                   | 1.71                                                     | 0.69-4.25               | -2.2                     | 1.73                                                       | 1.15-2.61               | 4.9                      |
| Model 4: Model 2 + other health behaviors <sup>d</sup> + BMI                | 1.26                                                     | 0.49-3.21               | 56.0                     | 1.65                                                       | 1.10-2.49               | 13.2                     |
| Model 5: Model 2 + blood cholesterol, systolic and diastolic blood pressure | 1.58                                                     | 0.63-3.95               | 12.8                     | 1.73                                                       | 1.15-2.60               | 4.9                      |
| Model 6: Model 2 + chronic diseases <sup>e</sup>                            | 1.54                                                     | 0.62-3.86               | 17.7                     | 1.64                                                       | 1.09-2.48               | 14.2                     |
| Model 7: Model 2 + inflammatory markers <sup>f</sup>                        | 1.24                                                     | 0.48-3.19               | 59.0                     | 1.55                                                       | 1.02-2.33               | 24.0                     |
| Model 8: fully-adjusted                                                     | 1.09                                                     | 0.41-2.85               | 83.6                     | 1.43                                                       | 0.94-2.19               | 38.0                     |

<sup>a</sup> HR comparing participants in the lower sex-specific tertile of forced expiratory volume/height<sup>2</sup> to those in the top two tertiles.

<sup>b</sup> % reduction comparing Model 2 to Model 1 and then Models 3 to 8 to Model 2

<sup>c</sup> Smoking history constituted using smoking status measured from 1985/88 to 2002/04 and current amount of tobacco smoked in 2002/04.

<sup>d</sup> Alcohol consumption, physical activity, fruit and vegetable consumption.

<sup>e</sup> Diabetes, Coronary Heart Disease and self-reported stroke.

<sup>f</sup> Interleukin-6 and C-reactive protein, log-transformed.

Web Table 5. The association between lung function and mortality: analyses **excluding those in the lowest tertile of the fat-free-mass distribution**<sup>a</sup>, Whitehall II study, United Kingdom, 2002-2010 (N deaths/N = 71/2842)

| Adjustment                                                                  | Hazard Ratio <sup>b</sup> | 95% Confidence Interval | % reduction <sup>c</sup> |
|-----------------------------------------------------------------------------|---------------------------|-------------------------|--------------------------|
| Model 1: adjusted for age and sex                                           | 1.92                      | 1.18-3.14               |                          |
| Model 2: Model 1 + smoking history <sup>d</sup>                             | 1.86                      | 1.14-3.04               | 4.9                      |
| Model 3: Model 2 + socioeconomic position                                   | 1.84                      | 1.12-3.01               | 1.7                      |
| Model 4: Model 2 + other health behaviors <sup>e</sup> + BMI                | 1.78                      | 1.08-2.92               | 7.1                      |
| Model 5: Model 2 + blood cholesterol, systolic and diastolic blood pressure | 1.85                      | 1.13-3.02               | 0.9                      |
| Model 6: Model 2 + chronic diseases <sup>f</sup>                            | 1.86                      | 1.13-3.04               | 0.0                      |
| Model 7: Model 2 + inflammatory markers <sup>g</sup>                        | 1.64                      | 0.99-2.71               | 20.3                     |
| Model 8: fully-adjusted                                                     | 1.67                      | 1.00-2.78               | 17.4                     |

<sup>a</sup> Fat-free mass (kg) was assessed during the clinical examination using bioimpedance scales (N with available data = 4253).

<sup>b</sup> HR comparing participants in the lower sex-specific tertile of forced expiratory volume/height<sup>2</sup> to those in the top two tertiles.

<sup>c</sup> % reduction comparing Model 2 to Model 1 and then Models 3 to 8 to Model 2

<sup>d</sup> Smoking history constituted using smoking status measured from 1985/88 to 2002/04 and current amount of tobacco smoked in 2002/04.

<sup>e</sup> Alcohol consumption, physical activity, fruit and vegetable consumption.

<sup>f</sup> Diabetes, Coronary Heart Disease and self-reported stroke.

<sup>g</sup> Interleukin-6 and C-reactive protein, log-transformed.

Web Table 6. The association between lung function and mortality: analyses **stratified by BMI categories**, Whitehall II study, United Kingdom, 2002-2010

| Adjustment                                                                  | Participants with BMI<30 kg/m <sup>2</sup><br>(N deaths/N =101/3976) |                         |                          | Participants with BMI≥30 kg/m <sup>2</sup><br>(N deaths/N = 38/841) |                         |                          |
|-----------------------------------------------------------------------------|----------------------------------------------------------------------|-------------------------|--------------------------|---------------------------------------------------------------------|-------------------------|--------------------------|
|                                                                             | Hazard Ratio <sup>a</sup>                                            | 95% Confidence Interval | % reduction <sup>b</sup> | Hazard Ratio <sup>a</sup>                                           | 95% Confidence Interval | % reduction <sup>b</sup> |
| Model 1: adjusted for age and sex                                           | 1.83                                                                 | 1.22-2.77               |                          | 1.99                                                                | 1.01-3.92               |                          |
| Model 2: Model 1 + smoking history <sup>c</sup>                             | 1.72                                                                 | 1.14-2.61               | 10.3                     | 1.96                                                                | 0.99-3.87               | 2.2                      |
| Model 3: Model 2 + socioeconomic position                                   | 1.65                                                                 | 1.08-2.50               | 7.7                      | 2.05                                                                | 1.04-4.07               | -6.7                     |
| Model 4: Model 2 + other health behaviors <sup>d</sup> + BMI                | 1.64                                                                 | 1.08-2.49               | 8.8                      | 1.88                                                                | 0.94-3.75               | 6.2                      |
| Model 5: Model 2 + blood cholesterol, systolic and diastolic blood pressure | 1.67                                                                 | 1.10-2.54               | 5.4                      | 1.92                                                                | 0.96-3.82               | 3.1                      |
| Model 6: Model 2 + chronic diseases <sup>e</sup>                            | 1.62                                                                 | 1.06-2.47               | 11.0                     | 1.83                                                                | 0.92-3.64               | 10.2                     |
| Model 7: Model 2 + inflammatory markers <sup>f</sup>                        | 1.54                                                                 | 1.01-2.34               | 20.4                     | 1.69                                                                | 0.84-3.43               | 22.0                     |
| Model 8: fully-adjusted                                                     | 1.40                                                                 | 0.91-2.15               | 38.0                     | 1.66                                                                | 0.80-3.45               | 24.7                     |

<sup>a</sup> HR comparing participants in the lower sex-specific tertile of forced expiratory volume/height<sup>2</sup> to those in the top two tertiles.

<sup>b</sup> % reduction comparing Model 2 to Model 1 and then Models 3 to 8 to Model 2

<sup>c</sup> Smoking history constituted using smoking status measured from 1985/88 to 2002/04 and current amount of tobacco smoked in 2002/04.

<sup>d</sup> Alcohol consumption, physical activity, fruit and vegetable consumption.

<sup>e</sup> Diabetes, Coronary Heart Disease and self-reported stroke.

<sup>f</sup> Interleukin-6 and C-reactive protein, log-transformed.

Web Table 7. The association between lung function and mortality: **analyses excluding deaths from respiratory diseases (N=2) and lung cancer (N=1) in the first 2 years of follow-up**, Whitehall II study, United Kingdom, 2002-2010 (N deaths/N = 136/4814)

| Adjustment                                                                  | Hazard Ratio <sup>a</sup> | 95% Confidence Interval | % reduction <sup>b</sup> |
|-----------------------------------------------------------------------------|---------------------------|-------------------------|--------------------------|
| Model 1: adjusted for age and sex                                           | 1.88                      | 0.82-1.66               |                          |
| Model 2: Model 1 + smoking history <sup>c</sup>                             | 1.81                      | 1.27-2.59               | 6.0                      |
| Model 3: Model 2 + socioeconomic position                                   | 1.79                      | 1.25-2.56               | 1.9                      |
| Model 4: Model 2 + other health behaviors <sup>d</sup> + BMI                | 1.70                      | 1.19-2.43               | 10.7                     |
| Model 5: Model 2 + blood cholesterol, systolic and diastolic blood pressure | 1.77                      | 1.24-2.53               | 3.8                      |
| Model 6: Model 2 + chronic diseases <sup>e</sup>                            | 1.68                      | 1.17-2.41               | 12.6                     |
| Model 7: Model 2 + inflammatory markers <sup>f</sup>                        | 1.57                      | 1.09-2.26               | 24.0                     |
| Model 8: fully-adjusted                                                     | 1.47                      | 0.72-1.79               | 35.1                     |

<sup>a</sup> HR comparing participants in the lower sex-specific tertile of forced expiratory volume/height<sup>2</sup> to those in the top two tertiles.

<sup>b</sup>% reduction comparing Model 2 to Model 1 and then Models 3 to 8 to Model 2

<sup>c</sup> Smoking history constituted using smoking status measured from 1985/88 to 2002/04 and current amount of tobacco smoked in 2002/04.

<sup>d</sup> Alcohol consumption, physical activity, fruit and vegetable consumption.

<sup>e</sup> Diabetes, Coronary Heart Disease and self-reported stroke.

<sup>f</sup> Interleukin-6 and C-reactive protein, log-transformed.

Web Table 8. The association between lung function and mortality: **analyses excluding participants with CRP level greater than 10 mg/L on the day of the clinical examination**, Whitehall II study, United Kingdom, 2002-2010 (N deaths/N = 129/4657)

| Adjustment                                                                  | Hazard Ratio <sup>a</sup> | 95% Confidence Interval | % reduction <sup>b</sup> |
|-----------------------------------------------------------------------------|---------------------------|-------------------------|--------------------------|
| Model 1: adjusted for age and sex                                           | 1.90                      | 1.30-2.78               |                          |
| Model 2: Model 1 + smoking history <sup>c</sup>                             | 1.83                      | 1.25-2.68               | 5.8                      |
| Model 3: Model 2 + socioeconomic position                                   | 1.80                      | 1.23-2.65               | 2.7                      |
| Model 4: Model 2 + other health behaviors <sup>d</sup> + BMI                | 1.73                      | 1.18-2.55               | 9.3                      |
| Model 5: Model 2 + blood cholesterol, systolic and diastolic blood pressure | 1.78                      | 1.22-2.62               | 4.6                      |
| Model 6: Model 2 + chronic diseases <sup>e</sup>                            | 1.68                      | 1.15-2.48               | 14.2                     |
| Model 7: Model 2 + inflammatory markers <sup>f</sup>                        | 1.62                      | 1.10-2.38               | 20.2                     |
| Model 8: fully-adjusted                                                     | 1.51                      | 0.71-1.87               | 31.8                     |

<sup>a</sup> HR comparing participants in the lower sex-specific tertile of forced expiratory volume/height<sup>2</sup> to those in the top two tertiles.

<sup>b</sup> % reduction comparing Model 2 to Model 1 and then Models 3 to 8 to Model 2

<sup>c</sup> Smoking history constituted using smoking status measured from 1985/88 to 2002/04 and current amount of tobacco smoked in 2002/04.

<sup>d</sup> Alcohol consumption, physical activity, fruit and vegetable consumption.

<sup>e</sup> Diabetes, Coronary Heart Disease and self-reported stroke.

<sup>f</sup> Interleukin-6 and C-reactive protein, log-transformed.
